# Supplementary material
Source: publisher site journal article supplement (https://study.sagepub.com/sites/default/files/appendix_3.pdf)
Supplement: Supplementary file 1 [file appendix_3.pdf]

**Appendix 3** Example of Table of Summary of Results for a report (Actual tests will vary)

| <b>SUMMARY OF RESULTS</b>                                                  |                                          |        |            |  |
|----------------------------------------------------------------------------|------------------------------------------|--------|------------|--|
| Name of Test                                                               | SS                                       | 95% CI | Descriptor |  |
| <b>Attainments in Literacy</b>                                             |                                          |        |            |  |
| <b>Wide Range Achievement Test 5 (WRAT 5) Green Form</b>                   | Single Word Reading                      |        |            |  |
|                                                                            | Single Word Spelling                     |        |            |  |
| <b>York Assessment of Reading for Comprehension (YARC) Passage Reading</b> | Single Word                              |        |            |  |
|                                                                            | Accuracy                                 |        |            |  |
|                                                                            | Rate                                     |        |            |  |
|                                                                            | Comprehension                            |        |            |  |
| <b>Detailed Assessment of Speed of Handwriting (DASH)</b>                  | Copy Best                                |        |            |  |
|                                                                            | Copy Fast                                |        |            |  |
|                                                                            | Alphabet                                 |        |            |  |
|                                                                            | Free Writing                             |        |            |  |
|                                                                            | Total                                    |        |            |  |
| <b>Underlying Ability</b>                                                  |                                          |        |            |  |
| <b>Wide Range Intelligence Test (WRIT)</b>                                 | Verbal Analogies                         |        |            |  |
|                                                                            | Vocabulary                               |        |            |  |
|                                                                            | <b>Verbal Composite</b>                  |        |            |  |
|                                                                            | Matrices                                 |        |            |  |
|                                                                            | Diamonds                                 |        |            |  |
|                                                                            | <b>Visual Composite</b>                  |        |            |  |
|                                                                            | <b>General Ability</b>                   |        |            |  |
| <b>Cognitive Processing</b>                                                |                                          |        |            |  |
| <b>Comprehensive Test of Phonological Processing 2 (CTOPP-2)</b>           | Elision                                  |        |            |  |
|                                                                            | Blending Words                           |        |            |  |
|                                                                            | Phoneme Isolation                        |        |            |  |
|                                                                            | <b>Phonological Awareness</b>            |        |            |  |
|                                                                            | Memory for Digits                        |        |            |  |
|                                                                            | Non-word Repetition                      |        |            |  |
|                                                                            | <b>Phonological Memory</b>               |        |            |  |
|                                                                            | Digits                                   |        |            |  |
|                                                                            | Letters                                  |        |            |  |
|                                                                            | <b>Rapid Naming</b>                      |        |            |  |
| <b>Test of Memory and Learning 2 (TOMAL 2)</b>                             | Digits Forwards                          |        |            |  |
|                                                                            | Letters Forwards                         |        |            |  |
|                                                                            | Manual Imitation                         |        |            |  |
|                                                                            | Digits Backwards                         |        |            |  |
|                                                                            | Letters Backwards                        |        |            |  |
|                                                                            | <b>Attention and Concentration Index</b> |        |            |  |
| Other relevant information e.g. Maths / Visual Motor Integration           |                                          |        |            |  |

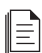

**Photocopiable**

*Assessment of Learners with Dyslexic-Type Difficulties* 2e © 2018 Sylvia Phillips and Kathleen Kelly (Sage: London).
